# Supplementary material for: Enhanced adsorption capacity of polypyrrole/TiO2 composite modified by carboxylic acid with hydroxyl group
Source: Royal Society of Chemistry journal article supplement (doi:10.1039/c6ra06738g), 2016-01-01
Supplement: c6ra06738g1.pdf [file c6ra06738g1.pdf]

**Enhanced adsorption capacity of polypyrrole/TiO<sub>2</sub> composite  
modified by carboxylic acid with hydroxyl group**

Jiangtao Feng, Jie Chen, Ning Wang, Jingjing Li, Jinwen Shi\*, Wei Yan\*

Department of Environmental Science and Engineering, State Key Laboratory of  
Multiphase Flow in Power Engineering, Xi'an Jiaotong University, Xi'an 710049,  
P.R. China.

\*Corresponding author: E-mail: yanwei@xjtu.edu.cn (W. Yan), jinwen\_shi@  
xjtu.edu.cn (J.W. Shi)

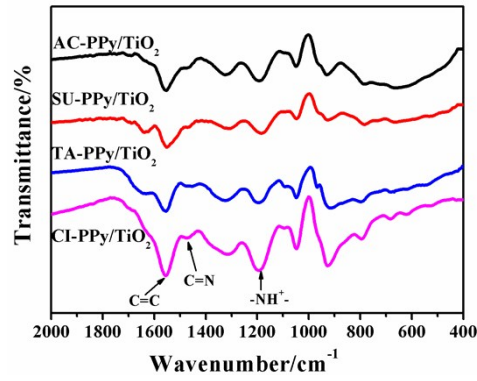

Fig.S1. FT-IR spectra of the as-prepared composites

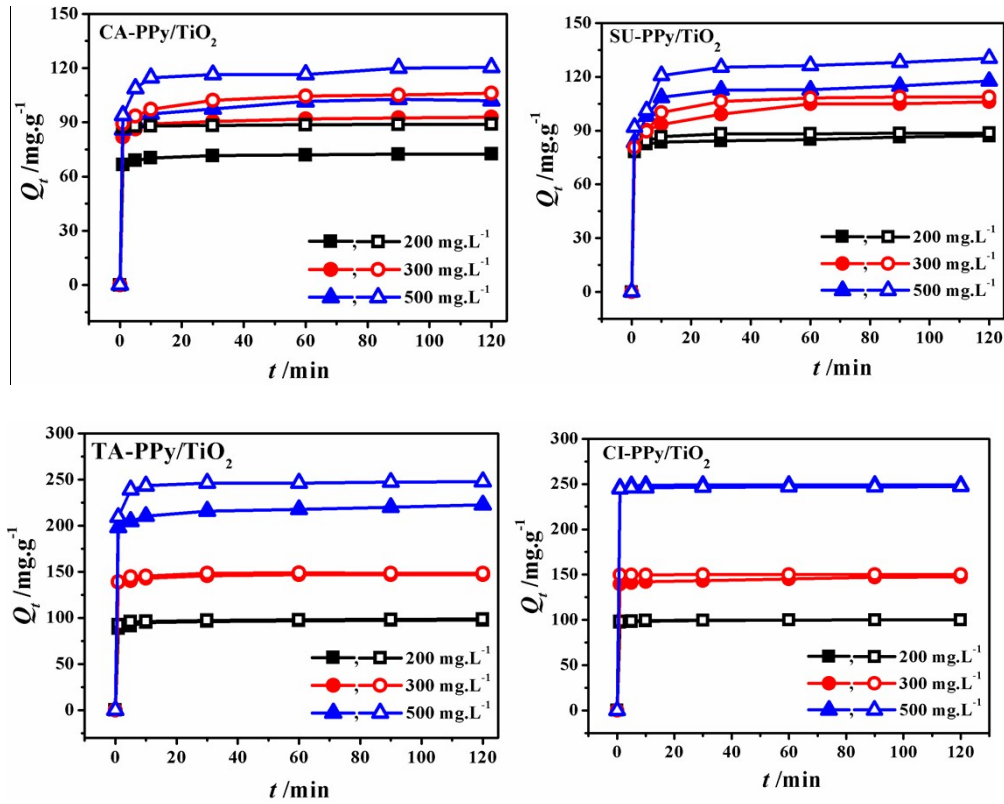

Fig.S2. Adsorption equilibrium curves of ARG (■, ●, ▲) and MB (□, ○, △) with various initial concentrations on the as-prepared composites

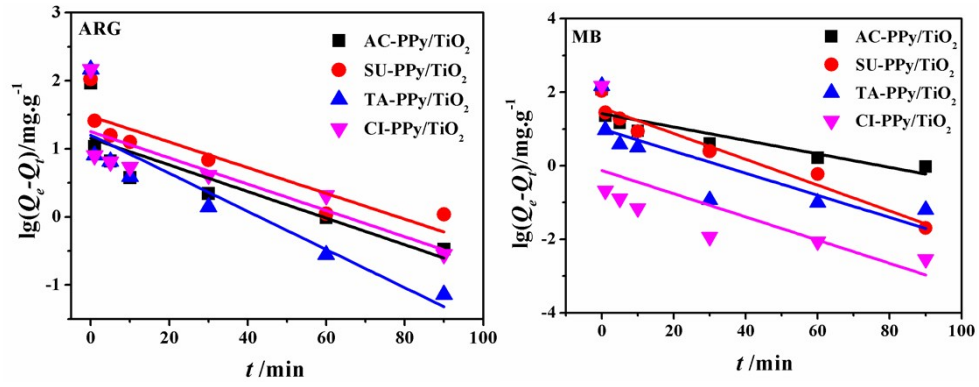

Fig.S3 Pseudo-first-order kinetics plot and fitting line for ARG and MB adsorbed onto the as-prepared composites

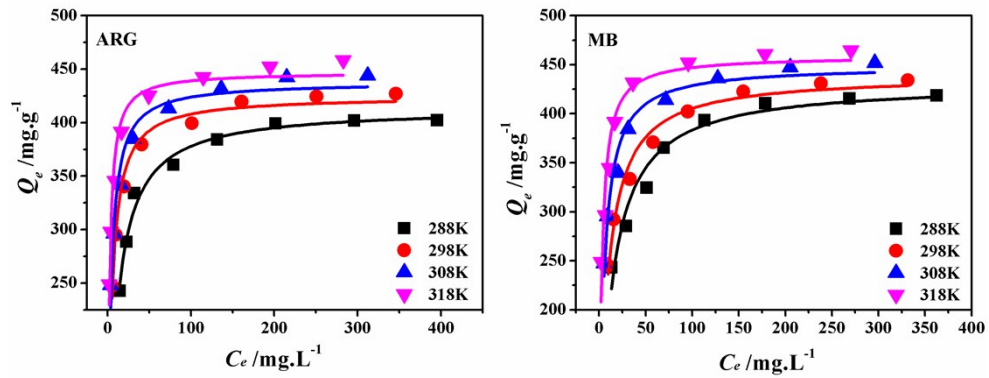

Fig.S4. Experimental dots and Langmuir isotherm models of ARG and MB adsorbed onto CI-PPy/TiO<sub>2</sub> at different kelvin temperature
